# Supplementary material
Source: MDPI journal article supplement (https://www.mdpi.com/2624-8549/3/3/76)
Supplement: s1 [file s1]

## Supporting Information for

# **Spectroscopic evidence of new low-dimensional planar carbon allotropes based on biphenylene *via* on-surface Ullmann coupling**

**Teng Zhang <sup>1,\*</sup>, Cesare Grazioli <sup>2</sup>, Huixia Yang <sup>1</sup>, Kaiyue Jiang <sup>3</sup>, Iulia Emilia Brumboiu <sup>4</sup>, Liangguang Jia <sup>1</sup>, Liwei Liu <sup>1</sup>, Carla Puglia <sup>5</sup>, Xiaodong Zhuang <sup>3</sup> and Yeliang Wang <sup>1</sup>**

1 School of Integrated Circuits and Electronics, MIIT Key Laboratory for Low-Dimensional Quantum Structure and Devices, Beijing Institute of Technology (BIT), Beijing 100081, China

2 IOM-CNR, Istituto Officina dei Materiali, Basovizza SS-14, Km 163.5, 34149 Trieste, Italy

3 The Meso-Entropy Matter Lab, The State Key Laboratory of Metal Matrix Composites, Shanghai Key Laboratory of Electrical Insulation and Thermal Ageing, School of Chemistry and Chemical Engineering, Frontiers Science Center for Transformative Molecules, Shanghai Jiao Tong University, Shanghai 200240, China

4 Pohang University of Science and Technology (POSTECH), Department of Chemistry, 37673

5 Department of Physics and Astronomy, Uppsala University, Box 516, SE-751 20 Uppsala, Sweden

\* Correspondence: [teng.zhang@bit.edu.cn](mailto:teng.zhang@bit.edu.cn)

## Methods

The Cu(111) sample was cleaned by cycles of  $\text{Ar}^+$  sputtering and annealing. The cleanness of Cu(111) is checked by PES. Synthesis from the  $\text{BPBr}_2$  precursors and analysis of the 2D system were performed at the ANCHOR endstation of the ALOISA beamline of ELETTRA synchrotron facility. The molecule was deposited onto the Cu(111) surface through physical vapor deposition from a Kentax<sup>TM</sup> evaporator under Ultra High Vacuum (UHV). During deposition, the quartz crucible was heated to 43°C and the pressure is in  $1 \times 10^{-7}$  mbar range. Keeping the Cu(111) substrate at room temperature (RT), the growth of  $\text{BPBr}_2$  film is saturated at 1 monolayer (ML) coverage where the thickness was estimated by the attenuation method of Cu3p signal. The whole on-surface reaction is then monitored *in-situ* by Photoelectron Spectroscopy (PES). The NEXAFS spectra were acquired in Auger yield mode. The ARUPS scans were obtained with a He(II) non-monochromatized source (Omicron HIS 13), setting the pass energy of the electron analyzer to 10 eV.

## Preliminary STM results

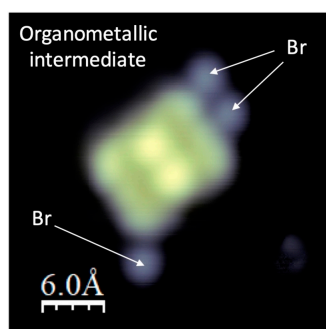

**Figure S1: STM image of  $\text{BPBr}_2/\text{Cu}(111)$  system prepared at RT. Scan parameters: Bias = -40 mV,  $I_t$  = 50 pA. Measuring temperature: 5 K. Scan area: 3 nm  $\times$  3 nm.**

It is evident that the Br atoms have already detached from  $\text{BPBr}_2$  molecule but remained on the surface, supporting our spectroscopic results (Fig. 1 in the manuscript). The  $\text{BPBr}_2$  already forms organometallic intermediate (highlighted in yellow) as also shown in previous studies [1]. The bright spots in the middle of the organometallic intermediate prove its non-flat orientation of the benzene rings, in agreement with our NEXAFS dichroism results in the manuscript.

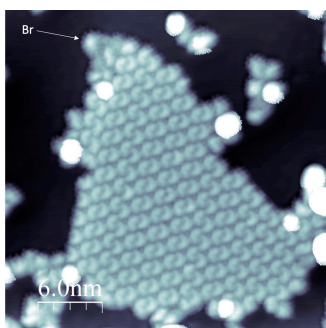

**Figure S2: STM image of  $\text{BPBr}_2/\text{Cu}(111)$  system after annealing to 200°C. Scan parameters: Bias = -1 V,  $I_t$  = 100 pA. Measuring temperature: 5 K. Scan area: 30 nm  $\times$  30 nm.**

Fig. S2 shows the STM image of the  $\text{BPBr}_2/\text{Cu}(111)$  system after annealing to 200°C. The morphology clearly shows that some polymerization process has happened and the product

is different from the RT sample. It is also evident that Br atoms are still on the Cu(111) surface (little dots around the polymerized products).

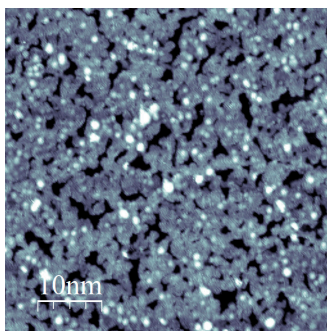

**Figure S3: STM image of BPBr<sub>2</sub>/Cu(111) system after annealing to 500°C. Scan parameters: Bias = -1 V, It = 100 pA. Measuring temperature: 5 K. Scan area: 50 nm × 50 nm.**

Fig. S3 shows the STM image of the BPBr<sub>2</sub>/Cu(111) system after annealing to 500°C. No Br is detected and an ultra-thin film (3 Å measured by STM height, ~1 monolayer) is formed. From the preliminary STM results so far, we believe the structure is more complicated than just BPC or BPN. We consider the possibility that there is a competition between the Ullmann type reaction and cyclobutadiene ring opening, which makes the reaction and the structure even more inspiring and interesting. More efforts are still needed to elucidate the reaction mechanism.

#### Synthesis route for BPBr<sub>2</sub> [2]

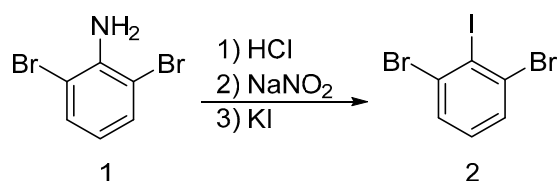

2,6-Dibromo-iodobenzene (2). A solution of NaNO<sub>2</sub> (7.97 g, 115 mmol) in H<sub>2</sub>O (60 mL) was added dropwise to a suspension of 2,6-dibromoaniline (26.3 g, 105 mmol) in aqueous HCl (100 mL, 12 M) at 0 °C. The mixture turned orange. The mixture was stirred at 0 °C for 90 min to afford an opaque red mixture. Additional NaNO<sub>2</sub> (2.11 g, 30.5 mmol) was added. The mixture was stirred for an additional 45 min at 0 °C and then filtered through a plug of glass wool into an ice-cooled jacketed addition funnel. The resulting red solution was added dropwise to a stirred solution of KI (173 g, 1.02 mol) in H<sub>2</sub>O (260 mL) at 20 °C to form a foamy black mixture. The mixture was stirred at 20 °C for 2 h. Aqueous Na<sub>2</sub>SO<sub>3</sub> (114 mL, 1.00 M, 114 mmol) was added and the mixture turned clear yellow. Methylene chloride (200 mL) was added and the mixture was stirred for 7 h. The mixture was separated and the aqueous layer was extracted with CH<sub>2</sub>Cl<sub>2</sub> (2 x 250 mL). The organic fractions were combined and washed with aqueous KOH (100 mL, 1 M), and dried over MgSO<sub>4</sub>. The solvent was removed under vacuum. The resulting red solid was recrystallized from hot ethanol to afford 2,6-dibromiodobenzene as off-white needles in two crops (total yield 32 g, 84%). <sup>1</sup>H NMR (400 MHz, CDCl<sub>3</sub>): δ 7.56 (d, J= 8.0 Hz, 2H, H3 and H5), 7.07 (t, J=8.0 Hz, 1H, H4).

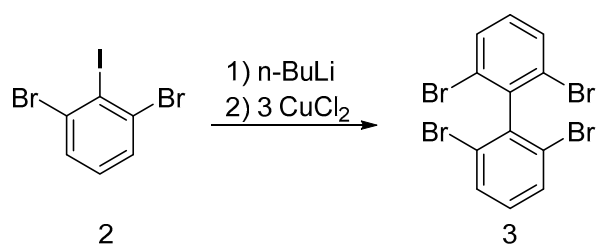

2,2',6,6'-Tetrabromo-biphenyl (3). A solution of n-BuLi (2.66 M in hexane, 16.2 mL, 43.2 mmol) was added dropwise to a solution of 2,6-dibromoiodobenzene (15.6 g, 43.4 mmol) in Et<sub>2</sub>O (300 mL) at -78 °C. The mixture was stirred at -78 °C for 2 h. Anhydrous CuCl<sub>2</sub> (17.4 g, 129 mmol) was added. The mixture was stirred at -78 °C for 2 h and allowed to warm to room temperature. Cold water (300 mL) was added and the mixture was stirred until no brown residue was left. The ether layer was separated. The aqueous layer was extracted with Et<sub>2</sub>O (3 x 300 mL) and benzene (100 mL). The organic fractions were combined and dried over MgSO<sub>4</sub>. The solvent was removed under vacuum. The resulting off-white solid was recrystallized from boiling cyclohexane to afford 2,2',6,6'-tetrabromobiphenyl as colorless crystals (7.24 g, 71%). This yield is improved from the literature yield (33%). <sup>1</sup>H NMR (400 MHz, CDCl<sub>3</sub>): δ 7.67 (d, J= 8.0 Hz, 2H, H3 and H5), 7.17 (t, J= 8.0 Hz, 1H, H4).

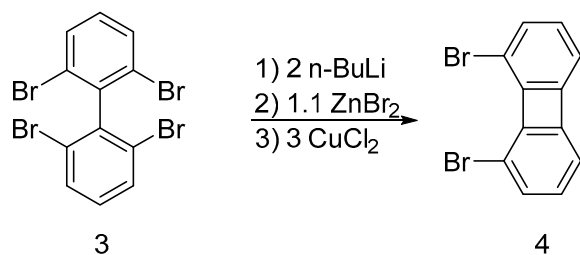

1,8-Dibromobiphenylene (4). 3 A solution of n-BuLi (2.5 M in hexane, 3.5 mL, 8.8 mmol) was added dropwise to a solution of 2,2',6,6'-tetrabromobiphenyl (1.49 g, 3.17 mmol) in THF (60 mL) at -78 °C. The mixture was stirred at -78 °C for 2 h and a fine white solid gradually precipitated. A solution of ZnBr<sub>2</sub> (0.783 g, 3.47 mmol) in THF (10 mL) was added dropwise via cannula. The flask was transferred to a cold bath maintained at -50 °C. The mixture was stirred for 2 h during which time the white solid slowly dissolved and the solution turned a bright yellow. The solution was cooled to -78 °C and cannula-transferred to a flask containing a suspension of anhydrous CuCl<sub>2</sub> (1.32 g, 9.82 mmol) in THF (80 mL) at -78 °C. The suspension was stirred for 1 h at -78 °C and allowed to warm to room temperature. HCl (3 M aqueous solution, 100 mL) was added and the resulting green solution was stirred for 10 min. The solution was extracted with benzene (3 x 200 mL), the extracts were combined and dried over MgSO<sub>4</sub>, and the solvent was removed under vacuum. The crude product was dissolved in benzene (10 mL), evaporated onto silica and purified by column chromatography with hexanes to yield a bright yellow microcrystalline solid (0.49 g, 50%). Attempts to scale up this procedure gave lower yields, probably due to inadequate temperature control. <sup>1</sup>H NMR (400 MHz, CDCl<sub>3</sub>): δ 6.84 (d, J = 8.0 Hz, 2H, H2 and H7), 6.55 (dd, J = 8.0 Hz, 2H, H3 and H6), 6.58 (d, J = 8.0 Hz, 2H, H4 and H5).

- [1] T. A. Balema, J. Miao, N. A. Wasio, C. J. Murphy, A. M. Larson, D. A. Patel, Y. S. Lin and E. C. H. Sykes, , *Journal of Physical Chemistry C* **2021**, 125(14); 7675-7685.
- [2] S. M. Kilyanek, X. Fang, R. F. Jordan, *Organometallics* **2009**, 28, 300-305.
